# Supplementary material for: Distribution of lead in single atmospheric particles
Source: Copernicus journal article supplement (doi:10.5194/acp-7-3195-2007), 2007-06-21
Supplement: Supplementary file 1 [file acp-7-3195-2007-supplement.pdf]

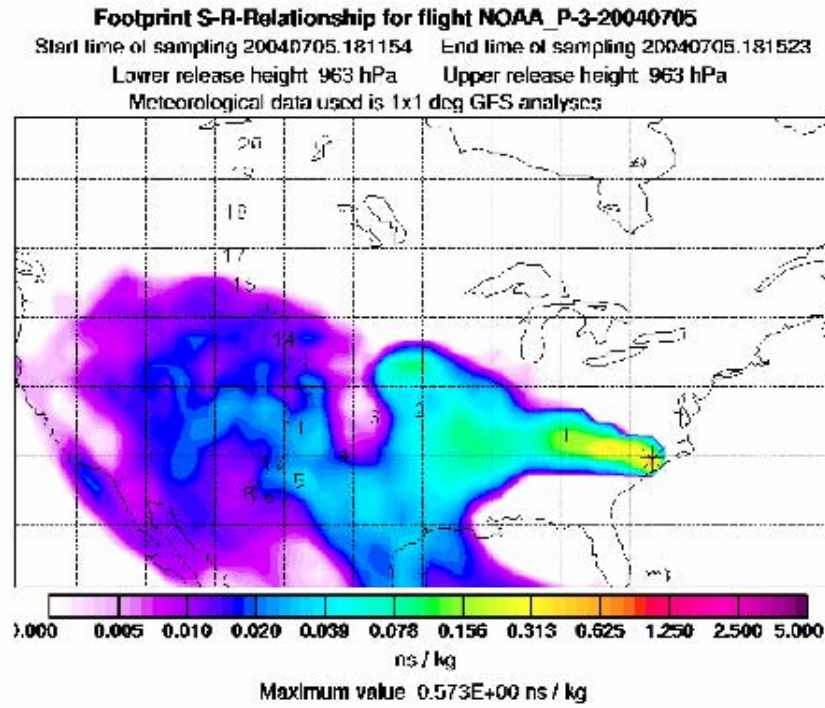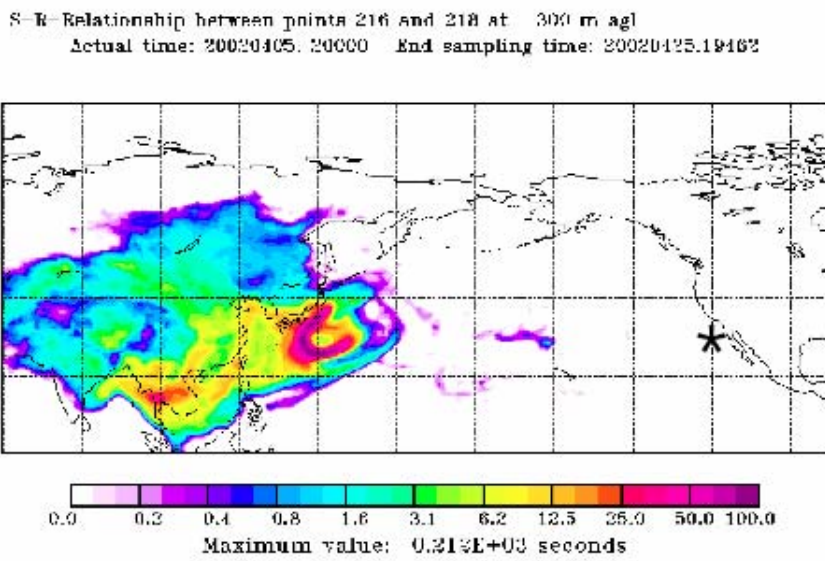

Figure S1. FLEXPART trajectory model results for the approximate regions of the highest measured frequency of Pb-containing particles and the highest relative Pb signal outside of urban areas (Figure 6).
